# Supplementary material
Source: PubMed Central journal article supplement (PMC7179332)
Supplement: NIHMS1576921-supplement-Supplemental_Table_1.pdf [file NIHMS1576921-supplement-Supplemental_Table_1.pdf]

Supplemental Table 1. Sensitivity Analysis: Linear Regression of Allostatic Load and Logistic Regression of Self-Reported Health by Linear EDS and EOD among AAWHHS Participants (N=207)

| Variable               | Allostatic Load |                 |         |                 | Self-reported Health |                |        |                |
|------------------------|-----------------|-----------------|---------|-----------------|----------------------|----------------|--------|----------------|
|                        | EDS             |                 | EOD     |                 | EDS                  |                | EOD    |                |
|                        | $\beta$         | (95% CI)        | $\beta$ | (95% CI)        | OR                   | (95% CI)       | OR     | (95% CI)       |
| Discrimination         | -0.003          | (-0.026, 0.019) | -0.018  | (-0.053, 0.016) | 0.998                | (0.974, 1.022) | 1.018  | (0.981, 1.056) |
| Age                    | **0.078         | (0.026, 0.130)  | **0.082 | (0.029, 0.134)  | 0.953                | (0.899, 1.001) | 0.949  | (0.895, 1.006) |
| ≤ High School Diploma  | **1.085         | (0.417, 1.753)  | **1.029 | (0.352, 1.706)  | 1.496                | (0.741, 3.019) | 1.606  | (0.784, 3.292) |
| Not Employed           | -0.407          | (-1.033, 0.220) | -0.372  | (-0.999, 0.255) | 1.393                | (0.692, 2.805) | 1.328  | (0.657, 2.684) |
| ≤ 100% Federal Poverty | 0.443           | (-0.328, 1.214) | 0.478   | (-0.294, 1.249) | 1.889                | (0.871, 4.098) | 1.834  | (0.841, 4.000) |
| Not Married/Partnered  | 0.216           | (-0.446, 0.877) | 0.210   | (-0.445, 0.866) | 0.923                | (0.445, 1.914) | 0.912  | (0.442, 1.899) |
| Taking CV Meds         | *0.931          | (0.158, 1.704)  | *0.939  | (0.168, 1.711)  | *2.679               | (1.205, 5.954) | *2.684 | (1.205, 5.975) |
| Taking DM Meds         | **1.799         | (0.516, 3.083)  | **1.763 | (0.480, 3.045)  | 0.828                | (0.190, 3.611) | 0.883  | (0.204, 3.824) |

AAWHHS=African American Women's Heart & Health Study; EDS=Everyday Discrimination Scale; EOD=Experiences of Discrimination Scale; CV=Cardiovascular; DM=Diabetes Mellitus;  $\beta$ =beta coefficient; OR=odds ratio; CI=confidence interval; \* $p<0.05$ ; \*\* $p<0.01$ ; Referent group: Moderate; High-risk covariates reported
